# 1 Fusicatenibacter Is Associated with Kefir Drinking \*

2 **Richard Sprague** *Airdoc, Inc.*

---

3 Daily 16s rRNA-based microbiome sampling reveals that consumption of the fermented drink, kefir, is associated with  
4 a previously-unexplored genus *Fusicatenibacter* of the *Firmicutes* phylum within family *Lachnospiraceae*.

---

## 5 Introduction

6 Kefir is a fermented milk drink produced by the action of bacteria and yeasts and believed to have medicinal uses. A  
7 rigorous microbial analysis by Walsh et al. (2016)<sup>1</sup> recently showed precisely which microbes are present in kefir,  
8 at various stages in the fermentation process. (See Figure 3). The grains themselves contain a combination of lactic  
9 acid bacteria (*Lactobacillus*, *Lactococcus*, *Leuconostoc*), acetic acid bacteria (*Acetobacter*), and yeast, clumped together  
10 with casein (milk proteins) and complex sugars in a matrix of a unique polysaccharide called Kefiran. The nutritional  
11 content apparently varies depending on fermentation time and other factors.<sup>2</sup>

12 Numerous studies indicate that regular kefir drinking has positive effects on health, and it is reasonable to assume  
13 that its known bacteriological properties would affect the gut microbiome, but we are unaware of previous research  
14 that conclusively demonstrates that microbes in kefir make it successfully through the acidic environment of the  
15 stomach.

16 Although similar doubts have been expressed about another fermented dairy product, yogurt, careful research has  
17 shown several microbial strains that pass through the body successfully. (Uyeno, Sekiguchi, and Kamagata (2008))  
18 Furthermore, several of the microbes apparently persist in the gut and can be observed a full 28 days after consumption.

19 We were interested to know if the same is true of kefir, and how it might alter the gut microbiome on a daily basis.  
20 We sequenced the 16S rRNA gene in 500 near-daily samples of the microbiome of a single subject, a 50-year-old male  
21 in excellent health. Replicating the experiment in David et al. (2014), we carefully tracked diet, sleep, location, activity,  
22 and other variables. Most samples were from gut, but bimonthly samples were regularly taken of skin, nose, and mouth  
23 as well.

24 Because we had several hundred days worth of daily microbiome sampling before the subject first encountered  
25 kefir, we also wanted to find if any new microbes appeared (or disappeared) as a result. Finally, by continuing to test  
26 long after the kefir consumption began, we were able to see how long any such microbes remain in the gut.

## 27 Results

28 We found that kefir consumption was associated with a clear change in the abundance of several organisms, including  
29 one, *Lactococcus*, whose presence could be confirmed in the drink as well. To our surprise, we also found at least one  
30 new organism, a novel one that had not been observed in hundreds of previous samples taken from the same subject.  
31 Furthermore, the new organism, *Fusicatenibacter*, appears to remain in the gut after ending the kefir consumption,  
32 indicating a persistent alteration of the gut microbiome.

33 We found the subject's gut microbiome contained high levels of *Lactococcus*, the main genus of microbe known to  
34 be found in kefir as shown in Figure 1.

35 Samples were taken near-daily throughout the period, so abundance levels are zero unless otherwise indicated, and  
36 kefir was consumed only on the dates indicated in blue. We note that levels seem to dip when on days when the kefir  
37 is not consumed, such as during trips out of town in mid-March and another in early-April.

38 We also spotted a new new microbe, *Fusicatenibacter* that appears to exactly trace the kefir consumption. (Figure  
39 2).

40 We sequenced the drink as well (see Table 1)

---

\*Replication files are available on the author's Github account (<http://github.com/richardsprague>). **Current version:** November 11, 2017 ;  
**Corresponding author:** [sprague@airdoc.com](mailto:sprague@airdoc.com)

<sup>1</sup>also see a [2-minute Youtube presentation](#)

<sup>2</sup>Otles and Cagindi (2003) and <http://files.cienciapatodos.webnode.pt/20000022-79ffe7af9e/Kefir.pdf>

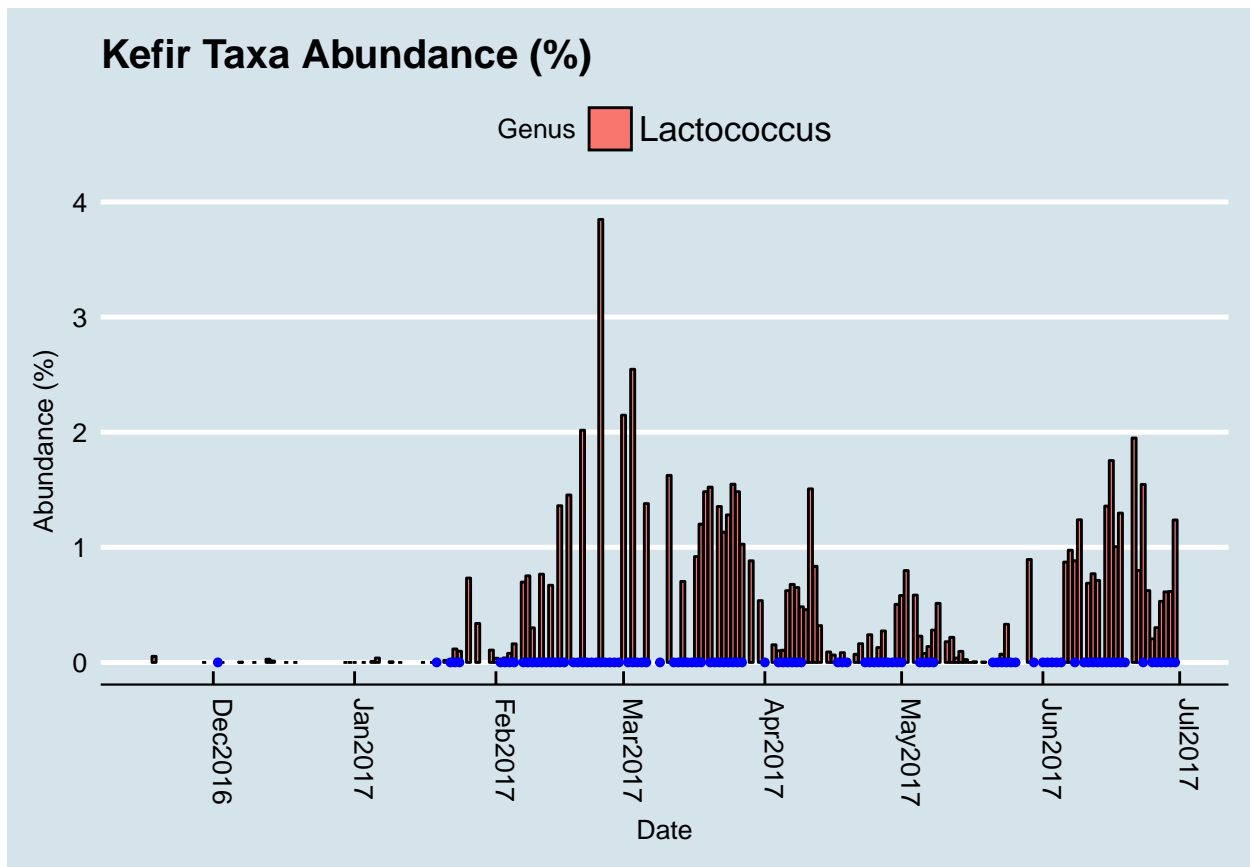

Figure 1: The blue dots are dates when kefir was consumed.

Table 1: Sequenced abundances found in the kefir drink before consumption.

|                  | Kefir (%) |
|------------------|-----------|
| Lactococcus      | 96.06     |
| Leuconostoc      | 3.02      |
| Lactobacillus    | 0.22      |
| Faecalibacterium | 0.14      |
| Roseburia        | 0.06      |

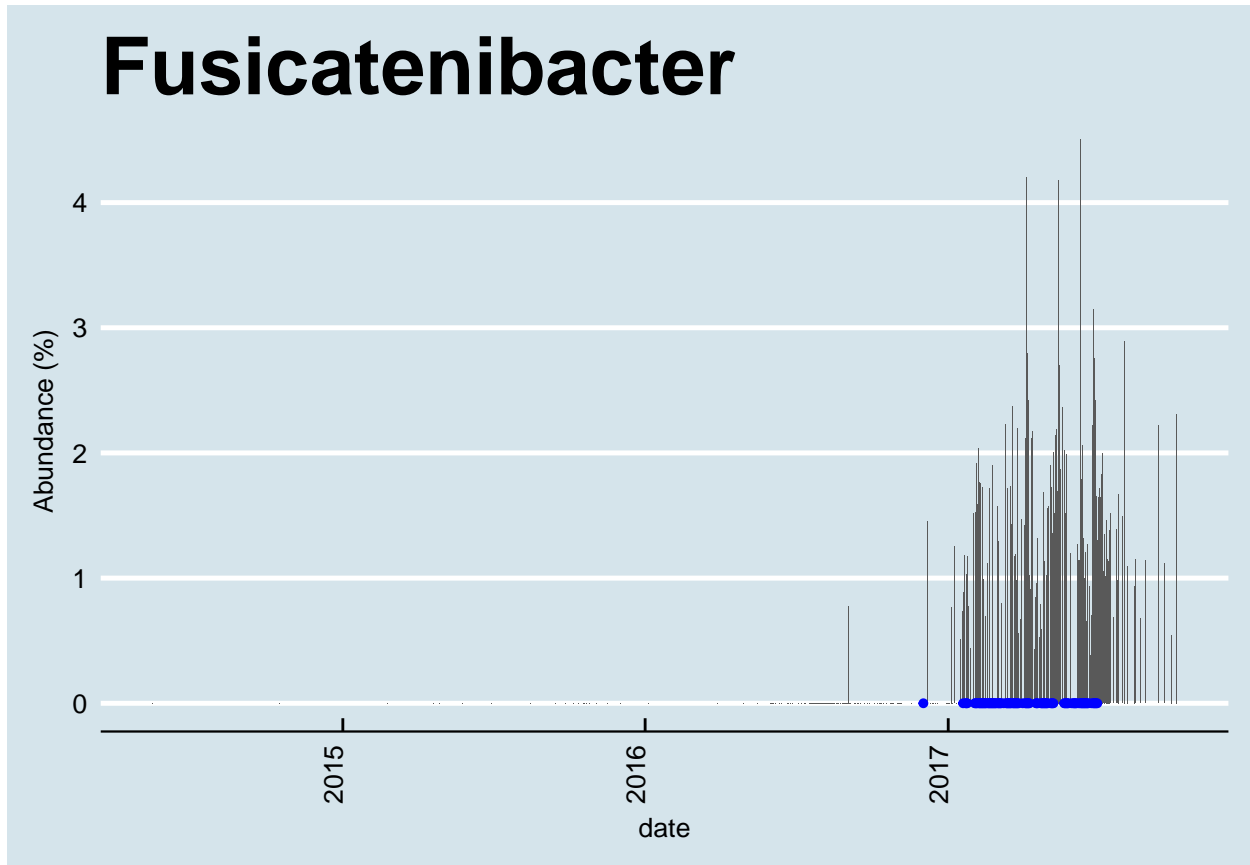

Figure 2: *Fusicatenibacter* is found at high abundance after drinking kefir. This chart shows abundance levels were zero since testing began more than two years previously.

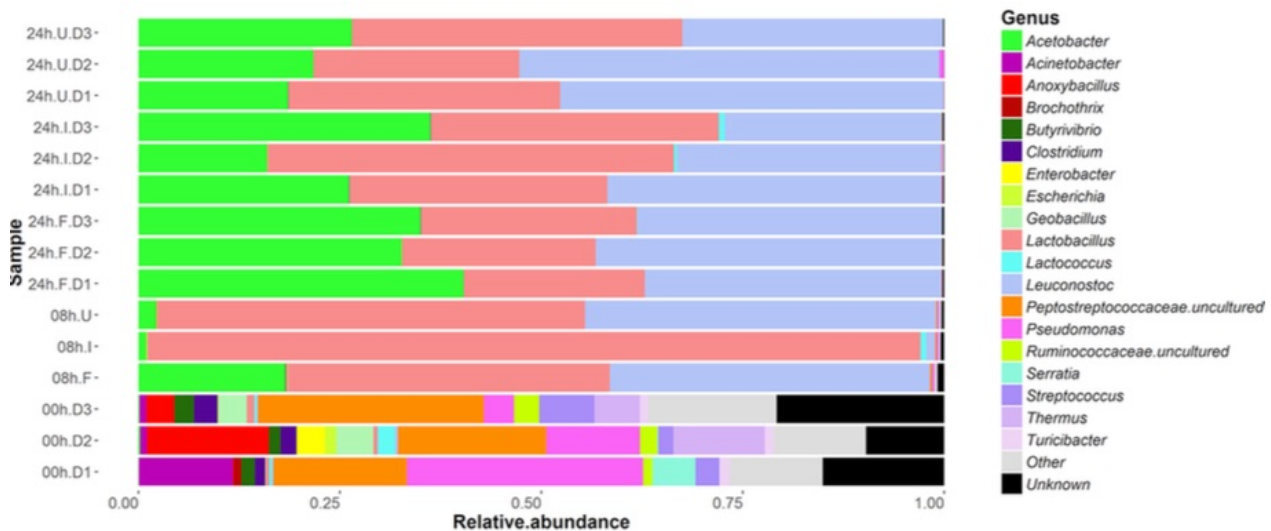

Figure 3: The composition of ordinary pasteurized milk as it changes from before adding kefir grains (time 0 at the bottom) until 24 hours have passed (top) and the milk has been transformed into just *Acetobacter*, *Lactobacillus*, and *Leuconostoc*. Reprinted from Walsh et al. (2016)

## 41 Discussion

42 Although we were pleased to see that one of the microbes in the original drink made it through the body and could  
43 be found in the gut, this result alone merely confirms what intuition would suggest: microbes that go in the mouth  
44 can successfully navigate the entire gastrointestinal tract. Other researchers have reported similar persistence of the  
45 same microbe *Lactococcus* after yogurt consumption, another fermented drink. Interestingly, our subject, an occasional  
46 yogurt eater, showed virtually none of this microbe in the years of measurement before drinking kefir. We speculate  
47 that there may be something uniquely robust about the particular species of *Lactococcus* found in this sample, one that  
48 may not be found in the commercially-available yogurt previously consumed by the subject.

49 It is interesting to note that the subject was drinking homemade kefir, fermented overnight in his kitchen, and thus  
50 exposed to the same environmental microbes that would have surrounded the subject himself. We hypothesize that  
51 the known high variance in microbial environments may play a significant role in which microbes appear in the gut.  
52 Commercially-purchased kefir is produced in sanitized industrial environments which, while enabling a consistent  
53 product and protective against pathogens, may inevitably result in differences in microbial strains.

54 We do not understand why a novel microbe, *Fusicatenibacter* would appear in the gut in such large quantities  
55 immediately after the first drink. We confirmed with the lab that this microbe was unlikely to result from contamination.  
56 Although it had not been found in this subject previously, the lab reports that it is found regularly in samples from  
57 other people. Analysis of the plates on which the subject's samples were processed indicated no irregularities; in fact,  
58 the wells directly adjacent to the subject's sample did not show any of this microbe, though that was present in other  
59 samples processed in the same run.

60 A literature search reveals nothing of clinical or other apparent interest about this microbe, a Clostridium that  
61 appears within the family *Lachnospiraceae* of phylum *Firmicutes*. We can find no apparent link to health or other  
62 conditions documented by other projects. Since it persists and makes up from 1-4% of the subject's post-kefir microbiome,  
63 we think it must have found a role in the microbial ecosystem.

64 Note that the subject remained in excellent health before and after the kefir consumption. We could detect no  
65 significant differences in blood chemistry or other quantitative health metrics. A review of his activity, sleep, and diet  
66 reveals no other significant differences that might compound the microbiome changes that occurred after beginning  
67 kefir.

## 68 Methods

69 Samples were collected on a daily basis, following instructions from commercially-available kits from uBiome, Inc.  
70 Fecal samples were lightly mixed and swabbed throughout to lessen distribution anomalies within the sample. The  
71 swabs were stirred into a lysis buffer and then transported at room temperatures to the uBiome lab. Genomic DNA  
72 was extracted by a liquid-handling robot, amplified up to 30 times using PCR, with primers inserted at the V4 subunit  
73 of the rRNA gene ((515F: GTGCCAGCMGCCGCGTAA and 806R: GGACTACHVGGGTWTCTAAT) using Illumina  
74 NextSeq platform rendering 2 x 150bp pair-end sequences.

75 Samples were barcoded with a unique combination of forward and reverse indexes allowing for simultaneous  
76 processing of multiple samples. De-multiplexing of samples was performed using Illumina's BCL2FASTQ algorithm.  
77 Acquired reads were filtered using an average Q-score > 30. Primers and any leading bases were subsequently trimmed  
78 from the reads, and forward and reverse reads were appended together. To effectively cluster real biological sequences  
79 and to identify reads that contain errors as a product of sequencing, reads were clustered using the Swarm algorithm  
80 (Mahé et al. 2014) using a distance of 1 nucleotide. The most abundant sequence per cluster was considered the real  
81 biological sequence and was assigned the count of all reads in the cluster.

82 The representative reads from all clusters were subjected to chimera removal using the VCHIME algorithm (Rognes  
83 et al. 2016). Reads passing all above filters were aligned using an in-house database of 16S sequences derived from the  
84 NCBI-nr database (Benson et al. 2013). Decreasing sequence identities were used to map reads to different taxonomic  
85 rankings: > 97% sequence identity was used for the assignment to a species, > 95% sequence identity for the assignment  
86 to a genus, > 90% for assignment to a family, > 85% for assignment to an order, > 80% for assignment to a class, and  
87 > 77% for assignment to a phylum. The relative abundance of each taxonomic group was calculated by dividing the  
88 abundance of the taxonomic group to all sequences that map to any sequence in the bacterial domain.

89 Bionformatics was performed in R using Phyloseq McMurdie and Holmes (2013).

## 90 **References**

- 91 David, Lawrence A., Arne C. Materna, Jonathan Friedman, Maria I. Campos-Baptista, Matthew C. Blackburn, Allison  
92 Perrotta, Susan E. Erdman, and Eric J. Alm. 2014. "Host Lifestyle Affects Human Microbiota on Daily Timescales."  
93 *Genome Biology* 15 (7): R89. doi:[10.1186/gb-2014-15-7-r89](https://doi.org/10.1186/gb-2014-15-7-r89).
- 94 McMurdie, Paul J., and Susan Holmes. 2013. "Phyloseq: An R Package for Reproducible Interactive Analysis and  
95 Graphics of Microbiome Census Data." *PLoS ONE* 8 (4): e61217. <http://dx.plos.org/10.1371/journal.pone.0061217>.
- 96 Otles, Semih, and Ozlem Cagindi. 2003. "Kefir: A Probiotic Dairy-Composition, Nutritional and Therapeutic  
97 Aspects." *Pakistan Journal of Nutrition* 2 (2). Science Alert: 54–59. doi:[10.3923/pjn.2003.54.59](https://doi.org/10.3923/pjn.2003.54.59).
- 98 Uyeno, Yutaka, Yuji Sekiguchi, and Yoichi Kamagata. 2008. "Impact of Consumption of Probiotic Lactobacilli-  
99 Containing Yogurt on Microbial Composition in Human Feces." *International Journal of Food Microbiology* 122 (1):  
100 16–22. doi:[10.1016/j.ijfoodmicro.2007.11.042](https://doi.org/10.1016/j.ijfoodmicro.2007.11.042).
- 101 Walsh, Aaron M., Fiona Crispie, Kieran Kilcawley, Orla O'Sullivan, Maurice G. O'Sullivan, Marcus J. Claesson, and  
102 Paul D. Cotter. 2016. "Microbial Succession and Flavor Production in the Fermented Dairy Beverage Kefir." Edited by  
103 Rachel J. Dutton. *mSystems* 1 (5): e00052–16. doi:[10.1128/mSystems.00052-16](https://doi.org/10.1128/mSystems.00052-16).
